# Supplementary material for: Adaptability and Stability of Faba Bean (Vicia faba L.) Accessions under Diverse Environments and Herbicide Treatments
Source: MDPI journal article supplement (doi:10.3390/plants11030251), 2022-01-19
Supplement: s1 [file s1]

Supplementary Material

**Table S1.** Faba bean accessions with different degree of tolerance to Metribuzin and Imazethapyr used in the present study.

| Accession Number | Accession Name | Origin         | Response to Metribuzin @ 250 g ai/ha | Response to Imazethapyr @ 75 g ai/ha |
|------------------|----------------|----------------|--------------------------------------|--------------------------------------|
| 1                | IG11561        | Algeria        | T                                    | T                                    |
| 2                | IG12110        | Algeria        | T                                    | T                                    |
| 3                | VF283          | Bulgaria       | T                                    | MT                                   |
| 4                | IG13906        | Canada         | MT                                   | T                                    |
| 5                | IG74363        | Canada         | T                                    | MT                                   |
| 6                | IG13530        | Cyprus         | MT                                   | T                                    |
| 7                | IG13547        | Cyprus         | T                                    | MT                                   |
| 8                | VF513          | Egypt          | MT                                   | T                                    |
| 9                | VF522          | Egypt          | T                                    | T                                    |
| 10               | IG11742        | Ethiopia       | T                                    | MT                                   |
| 11               | IG12659        | Ethiopia       | MT                                   | MT                                   |
| 12               | VF419          | Ethiopia       | MT                                   | MT                                   |
| 13               | IG104039       | Ethiopia       | T                                    | T                                    |
| 14               | FB2648         | Ethiopia       | T                                    | T                                    |
| 15               | FB2528         | France         | T                                    | T                                    |
| 16               | FB2601         | France         | T                                    | T                                    |
| 17               | IG104374       | Germany        | MT                                   | T                                    |
| 18               | IG104421       | Germany        | T                                    | T                                    |
| 19               | IG106453       | Greece         | MT                                   | T                                    |
| 20               | Flip 86-98FB   | Lebanon        | MT                                   | T                                    |
| 21               | FB1216         | Netherlands    | MT                                   | T                                    |
| 22               | IG11527        | Pakistan       | MT                                   | MT                                   |
| 23               | VF845          | Peru           | MT                                   | T                                    |
| 24               | IG99419        | Portugal       | MT                                   | T                                    |
| 25               | VF324          | Russia         | MT                                   | T                                    |
| 26               | VF339          | Russia         | MT                                   | T                                    |
| 27               | VF963          | Spain          | T                                    | T                                    |
| 28               | IG13945        | Sudan          | MT                                   | T                                    |
| 29               | IG14196        | Sudan          | MT                                   | T                                    |
| 30               | FB1720         | Switzerland    | MT                                   | T                                    |
| 31               | IG13008        | Syria          | MT                                   | T                                    |
| 32               | IG103043       | Syria          | MT                                   | MT                                   |
| 33               | IG70622        | Syria          | T                                    | T                                    |
| 34               | VF545          | Tunisia        | T                                    | MT                                   |
| 35               | IG12983        | Tunisia        | T                                    | T                                    |
| 36               | VF810          | United Kingdom | MT                                   | T                                    |
| 37               | VF260          | Unknown        | T                                    | MT                                   |

S susceptible, R resistant, MT moderately tolerant, according to Abou-Khater et al., 2021 and ICARDA, unpublished data.
